# Supplementary material for: Near-infrared carbon dots enable ultra-sensitive fluorometric detection of belzutifan: a novel approach for real-time therapeutic drug monitoring in cancer treatment
Source: Royal Society of Chemistry journal article supplement (doi:10.1039/d5ay01670c), 2025-01-01
Supplement: d5ay01670c1.pdf [file d5ay01670c1.pdf]

# **Near-Infrared Carbon Dots Enable Ultra-Sensitive Fluorometric Detection of Belzutifan: A Novel Approach for Real-Time Therapeutic Drug Monitoring in Cancer Treatment**

**Mohamed N. Goda<sup>a</sup>, Laila S. Alqarni<sup>a</sup>, K.S. Al-Namshah<sup>a</sup>, Hossieny Ibrahim<sup>b</sup>, Mohamed M. El-Wakil<sup>c</sup>, Ramadan Ali<sup>d</sup>, Al-Montaser Bellah H. Ali<sup>c\*</sup>**

<sup>a</sup> Department of Chemistry, College of Science, Imam Mohammad Ibn Saud Islamic University (IMSIU), Riyadh 11623, Saudi Arabia

<sup>b</sup> Department of Chemistry, Faculty of Science, Assiut University, Assiut 71516, Egypt

<sup>c</sup> Department of Pharmaceutical Analytical Chemistry, Faculty of Pharmacy, Assiut University, Assiut, Egypt.

<sup>d</sup> Department of Pharmaceutical Chemistry, Faculty of Pharmacy, University of Tabuk, Tabuk 71491, Saudi Arabia

\*e-mail: Almontaser\_bellah@aun.edu.eg

## 2.2. Instrumentation

The optical characterization of the synthesized carbon dots was probed through fluorescence and UV-Vis spectroscopic methods, wherein the fluorescence emission spectra were acquired on a Shimadzu RF-5301PC spectrofluorometer by exciting the samples at 290 nm with 5 nm slit widths, while the absorption spectra were generated using a Shimadzu 1601 PC UV-Vis spectrophotometer. The structural and morphological aspects were elucidated by transmission electron microscopy using a JEOL 2100F instrument operating at 200 kV accelerating voltage to visualize the size and shape of the carbon dots, X-ray diffraction patterns recorded with a Philips PW 1700 diffractometer, and Fourier transform infrared spectroscopy performed on KBr pellets using a Nicolet 6700 spectrometer. Furthermore, the surface chemical composition and bonding states were evaluated through X-ray photoelectron spectroscopy utilizing an ESCALAB250 spectrometer from Thermo Scientific.

## 2.4. Quantum yield determination of NIR-CDS

The quantum yield (QY) of NIR-CDS was calculated according to the following equation using quinine sulfate (QS) as a reference in 0.1 M H<sub>2</sub>SO<sub>4</sub> (QY = 54 %). By measuring the absorbance (less than 0.05) and emission spectra of a certain concentration of NIR-CDS and quinine sulfate at the excitation wavelength at 360 nm, the absorbance and fluorescence integral area were substituted into the following formula:

$$\phi_{NIR-CDS} = \phi_{QS} \times \frac{F_{NIR-CDS}}{F_{QS}} \times \frac{A_{QS}}{A_{NIR-CDS}} \times \frac{\eta_{NIR-CDS}}{\eta_{QS}}$$

$\Phi_{\text{NIR-CDS}}$  represents the quantum yield of NIR-CDS,  $\phi_{\text{QS}}$  represents the quantum yield of QS,  $F_{\text{NIR-CDS}}$  is the fluorescence intensity of NIR-CDS,  $F_{\text{QS}}$  is the fluorescence intensity of quinine sulphate,  $A$  refers to the absorbance value and  $\eta$  refers to the refractive index of the solvent (double distilled water). The synthesized NIR-CDS were dissolved in distilled water ( $\eta = 1.33$ ) and quinine sulfate was dissolved in 0.1 M  $\text{H}_2\text{SO}_4$  ( $\eta = 1.33$ ).

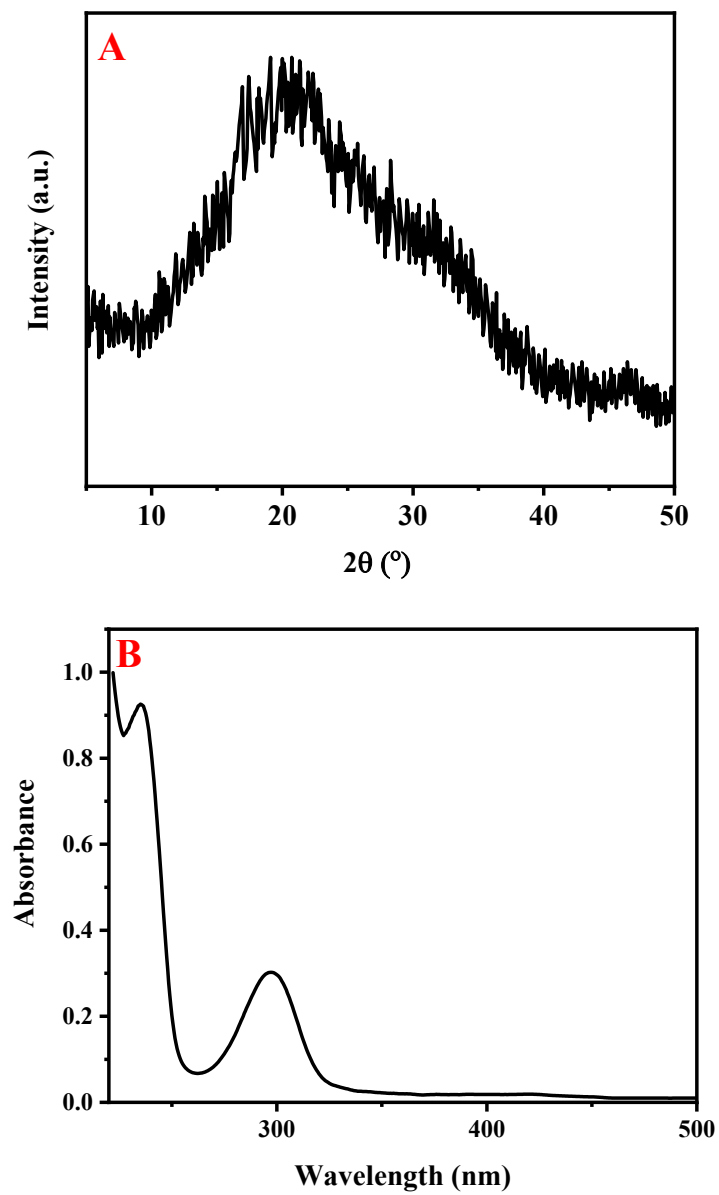

**Fig. S1.** (A) XRD pattern and (B) UV visible spectrum of NIR-CDs.

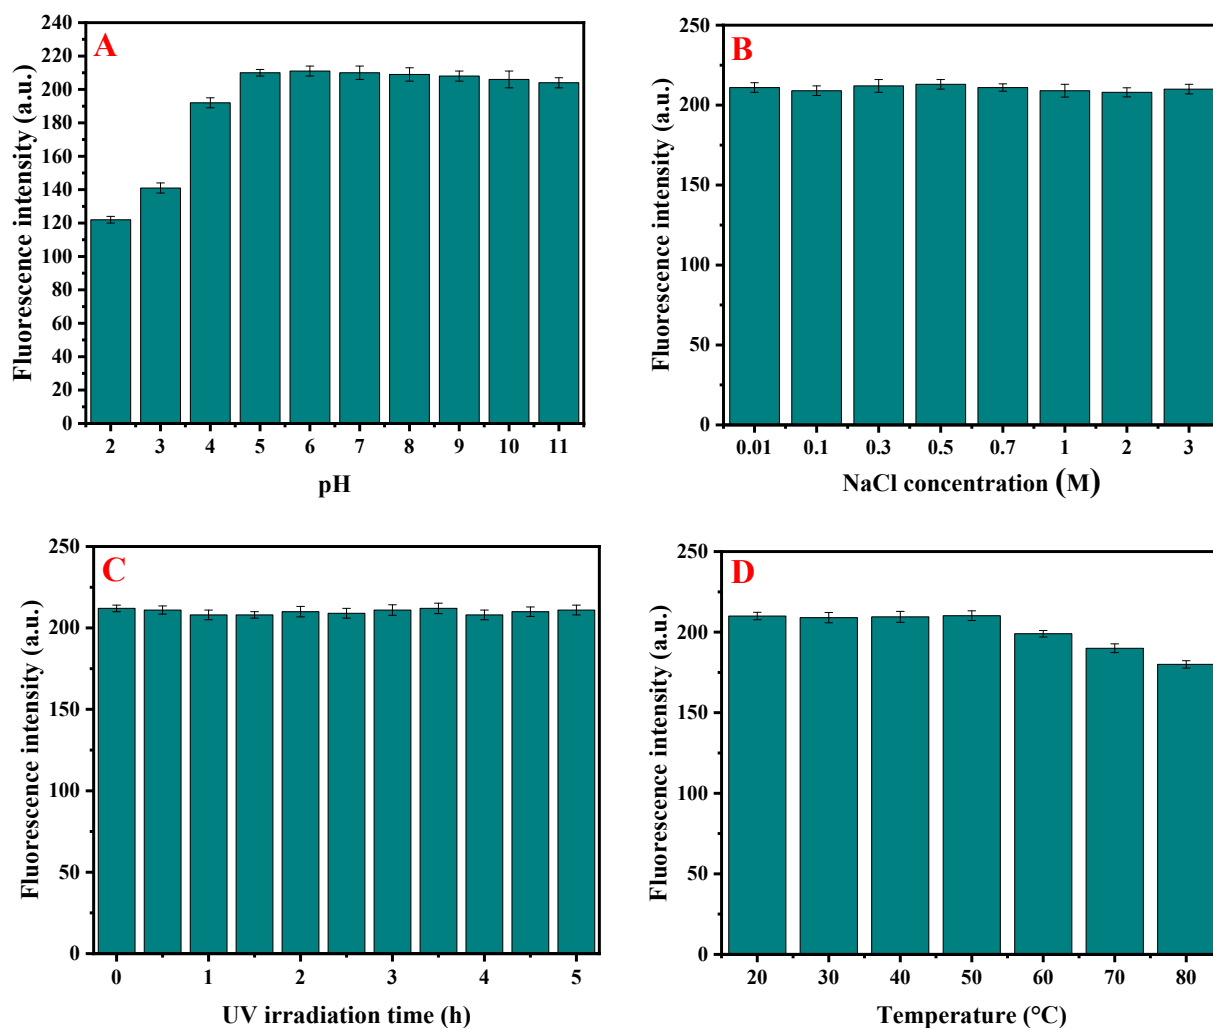

**Fig. S2.** Stability of the fluorescence response of the prepared NIR-CDs under various conditions: (A) effect of pH (2–11), (B) effect of NaCl concentration (0.1–3.0 M), (C) effect of UV irradiation time (0–5 h) and (D) effect of different temperatures (20 – 80 °C).

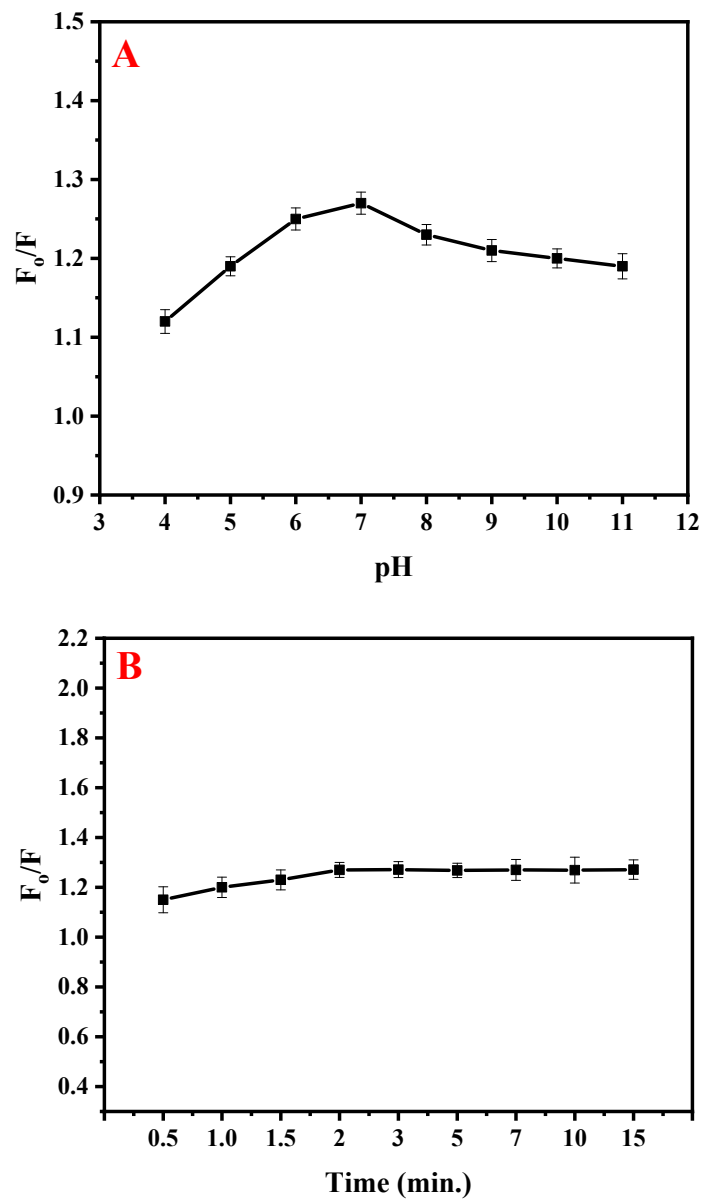

**Fig. S3.** (A) The effect of pH (4.0 to 10.0), (B) different reaction time (0.5 to 15.0 min.) on  $F_0/F$  of NIR-CDs after addition of belzutifan.

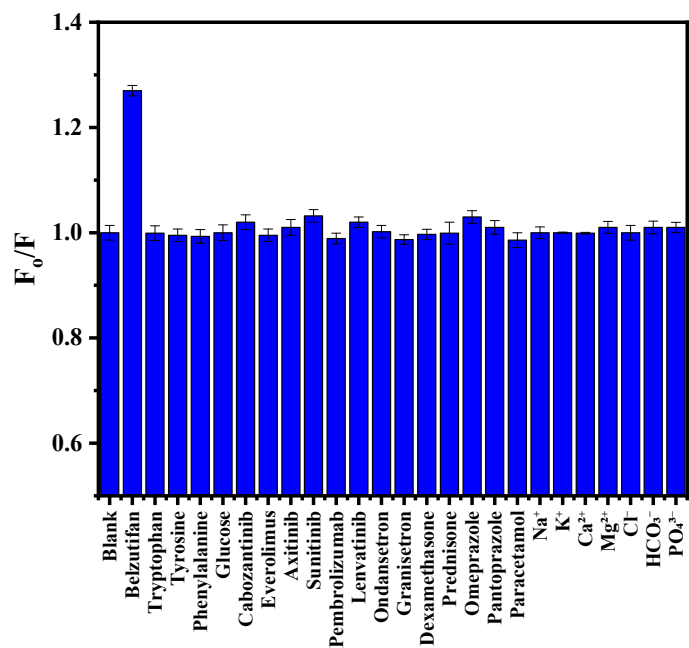

**Fig. S4.** The effect of different endogenous compounds, ions, co-administered pharmaceutical compounds on the ratio of fluorescence intensity ( $F_0/F$ ) of NIR-CDs.

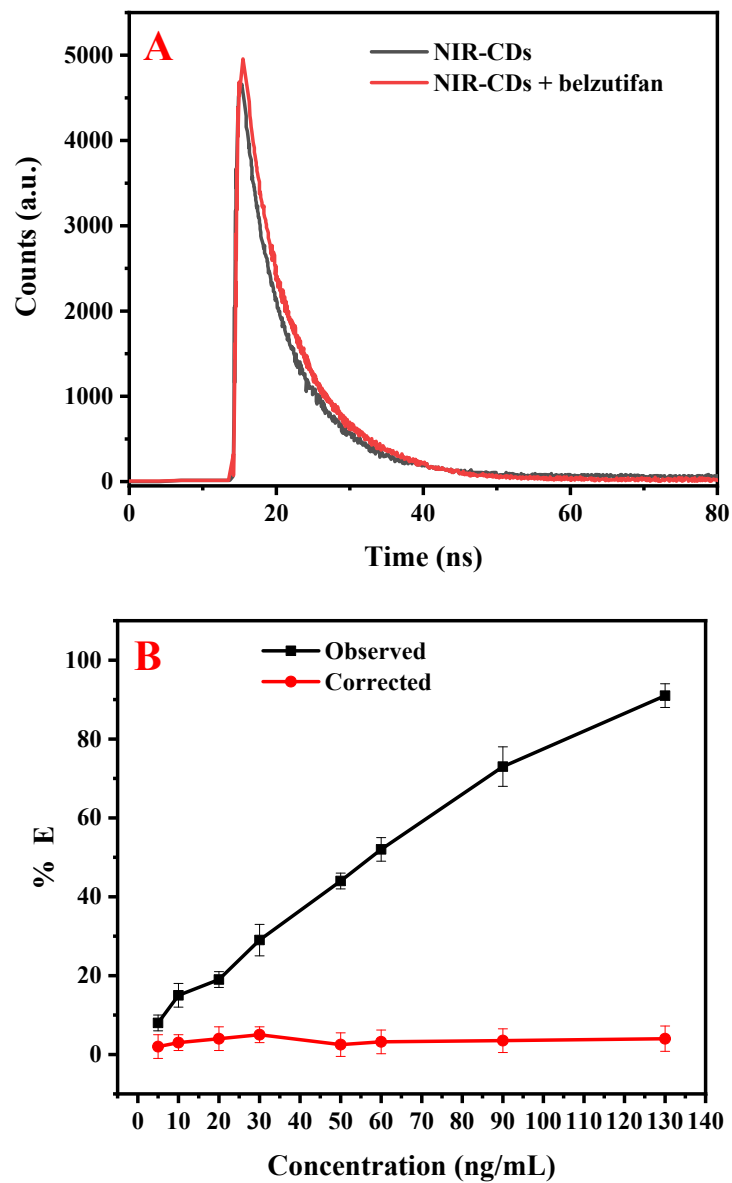

**Fig. S5.** (A) Fluorescence lifetime of NIR-CDs before and after addition of belzutifan, (B) Relationship between %E and concentration of belzutifan.



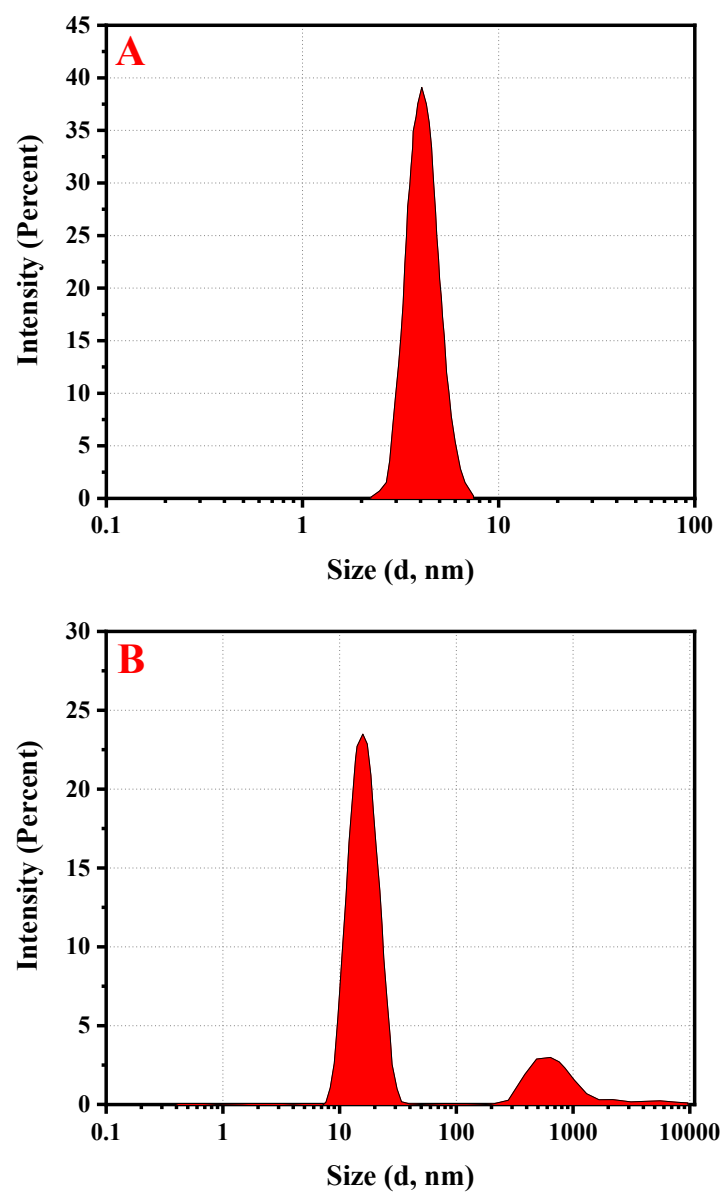

**Fig. S6.** Change in size of NIR-CDs in DLS on addition of belzutifan.

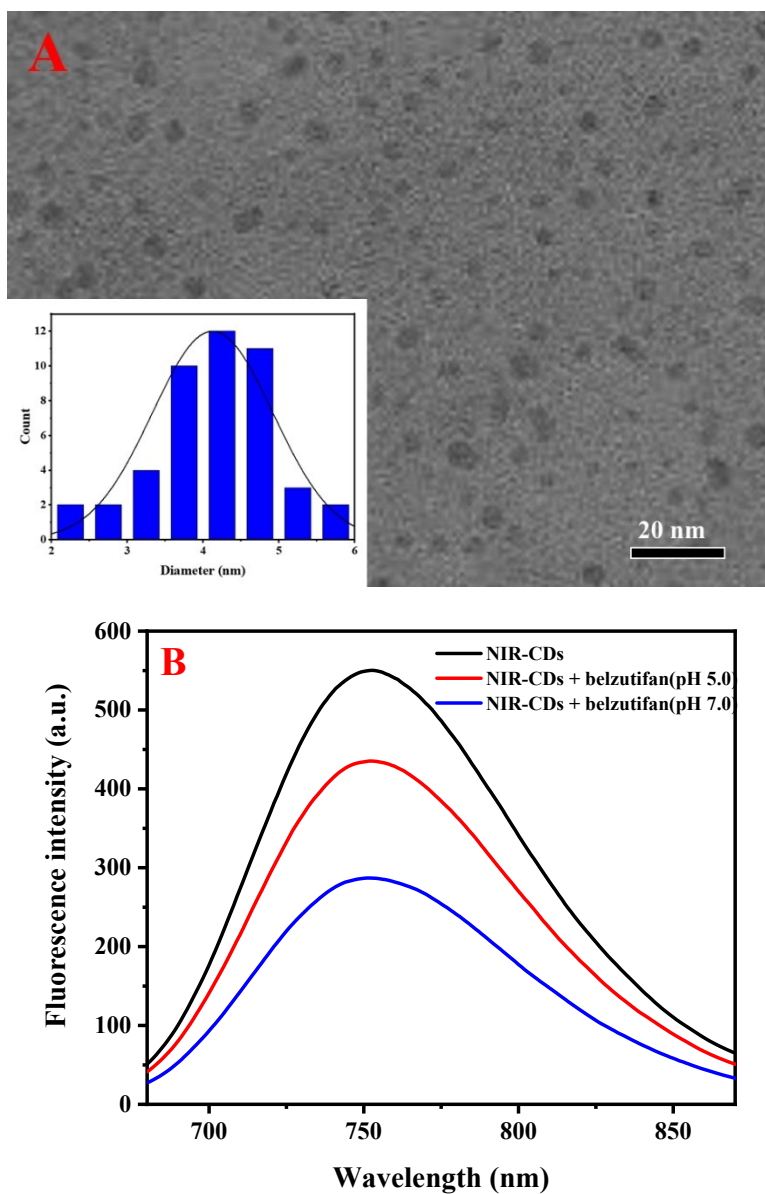

**Fig. S7.** TEM image of NIR-CDs after addition of belzutifan (pH 5.0), (B) Fluorescence intensity of NIR-CDs, NIR-CDs/belzutifan (pH 5.0) and NIR-CDs/belzutifan (pH 7.0).
